# Supplementary material for: Influences of Maternal and Paternal PTSD on Epigenetic Regulation of the Glucocorticoid Receptor Gene in Holocaust Survivor Offspring
Source: Atypon-hosted journal article supplement (doi:10.1176/appi.ajp.2014.13121571), 2014-05-16
Supplement: 872_ds001.pdf [file 872_ds001.pdf]

**Supplemental Data -**

**Influences of maternal and paternal PTSD on epigenetic regulation of the glucocorticoid receptor gene in Holocaust survivor offspring**

**Supplementary Table 1. qPCR target sequences and associated UPL probes**

| <b>Gene</b>          | <b>mRNA Sequence</b>                                                                                        | <b>Universal Probe Library Probe #</b> |
|----------------------|-------------------------------------------------------------------------------------------------------------|----------------------------------------|
| <b>NR3C1 exon 1F</b> | aactcgggtggcctcttaacgccgccca<br>gagagaccagttgatattcactgatggact<br>ccaagaa                                   | 67                                     |
| <b>GAPDH</b>         | agccacatcgctcagacaccatggggaag<br>gtgaaggctcggagcaacggatttggctg<br>attgggc                                   | 60                                     |
| <b>ACTB</b>          | ccaaccgcgagaagatgaccagatcatg<br>tttagacctcaacacccagccatgtac<br>gttgctatccaggctgtgctatccctgtac<br>cctctgg    | 64                                     |
| <b>B2M</b>           | ttctggcctggaggctatccagcgtactcc<br>aaagattcagtttactcacgtcatccagca<br>gagaatggaaagtcaatttctga                 | 42                                     |
| <b>RPLP0</b>         | gatcccaggaagacagggcgacctgg<br>aagtccaactactccttaagatcatccaact<br>attggatgattatccgaaatgttcattgtgg<br>gagcaga | 85                                     |

Gene expression primers and probes were designed based on the National Center for Biotechnology Information (NCBI) sequence (NM\_004117.2) using the ProbeFinder v2.50 software (Roche, Madison, Wisconsin, <http://www.roche-applied-science.com>).

**Supplementary Table 2. Characteristics of Controls and Offspring with No Parental PTSD**

|                                        | Comparison Subjects<br>(n=15) |       | No Parental PTSD<br>(n=15) |       | Analysis |          |    |
|----------------------------------------|-------------------------------|-------|----------------------------|-------|----------|----------|----|
|                                        | Mean                          | SD    | Mean                       | SD    | t        | df       | p  |
| Age                                    | 58.7                          | 11.2  | 55.7                       | 7.3   | -.85     | 1,<br>28 | ns |
| Body Mass Index                        | 27.54                         | 5.0   | 27.09                      | 4.44  | -.26     | 1,<br>28 | ns |
| Education (years)                      | 18.2                          | 2.4   | 17.9                       | 1.4   | -.37     | 1,<br>28 | ns |
| Depressive symptoms <sup>a</sup>       | 7.07                          | 5.51  | 7.0                        | 3.12  | -.041    | 1,<br>28 | ns |
| Anxiety symptoms <sup>b</sup>          | 28.57                         | 21.43 | 28.17                      | 11.99 | -.062    | 1,<br>27 | ns |
| Childhood Trauma <sup>c</sup>          | 6.8                           | 1.9   | 7.1                        | 1.8   | .50      | 1,<br>28 | ns |
|                                        | N                             | %     | N                          | %     | $\chi^2$ | df       | p  |
| Female                                 | 9                             | 60    | 7                          | 46.67 | .54      | 1        | ns |
| Major depressive disorder <sup>d</sup> | 6                             | 40    | 5                          | 33.3  | .144     | 1        | ns |
| Anxiety disorder <sup>e</sup>          | 3                             | 20    | 6                          | 40    | 1.43     | 1        | ns |

<sup>a</sup>Beck Depression Inventory.

<sup>b</sup>Spielberger State Trait Anxiety Inventory total score.

<sup>c</sup>Childhood Trauma Questionnaire total score.

<sup>d</sup>Data indicate the current or lifetime Structured Clinical Interview for DSM-IV (SCID) diagnosis of major depressive disorder.

<sup>e</sup>Data indicate the current or lifetime SCID diagnosis of an axis I anxiety disorder.
